# Supplementary material for: A design-phase environmental safe-and-sustainable-by-design categorization tool for the development and innovation of nano-enabled advanced materials (AdMaCat)
Source: Royal Society of Chemistry journal article supplement (doi:10.1039/d4en00068d), 2024-01-01
Supplement: d4en00068d1.pdf [file d4en00068d1.pdf]

## Supporting Information

Fig. 1

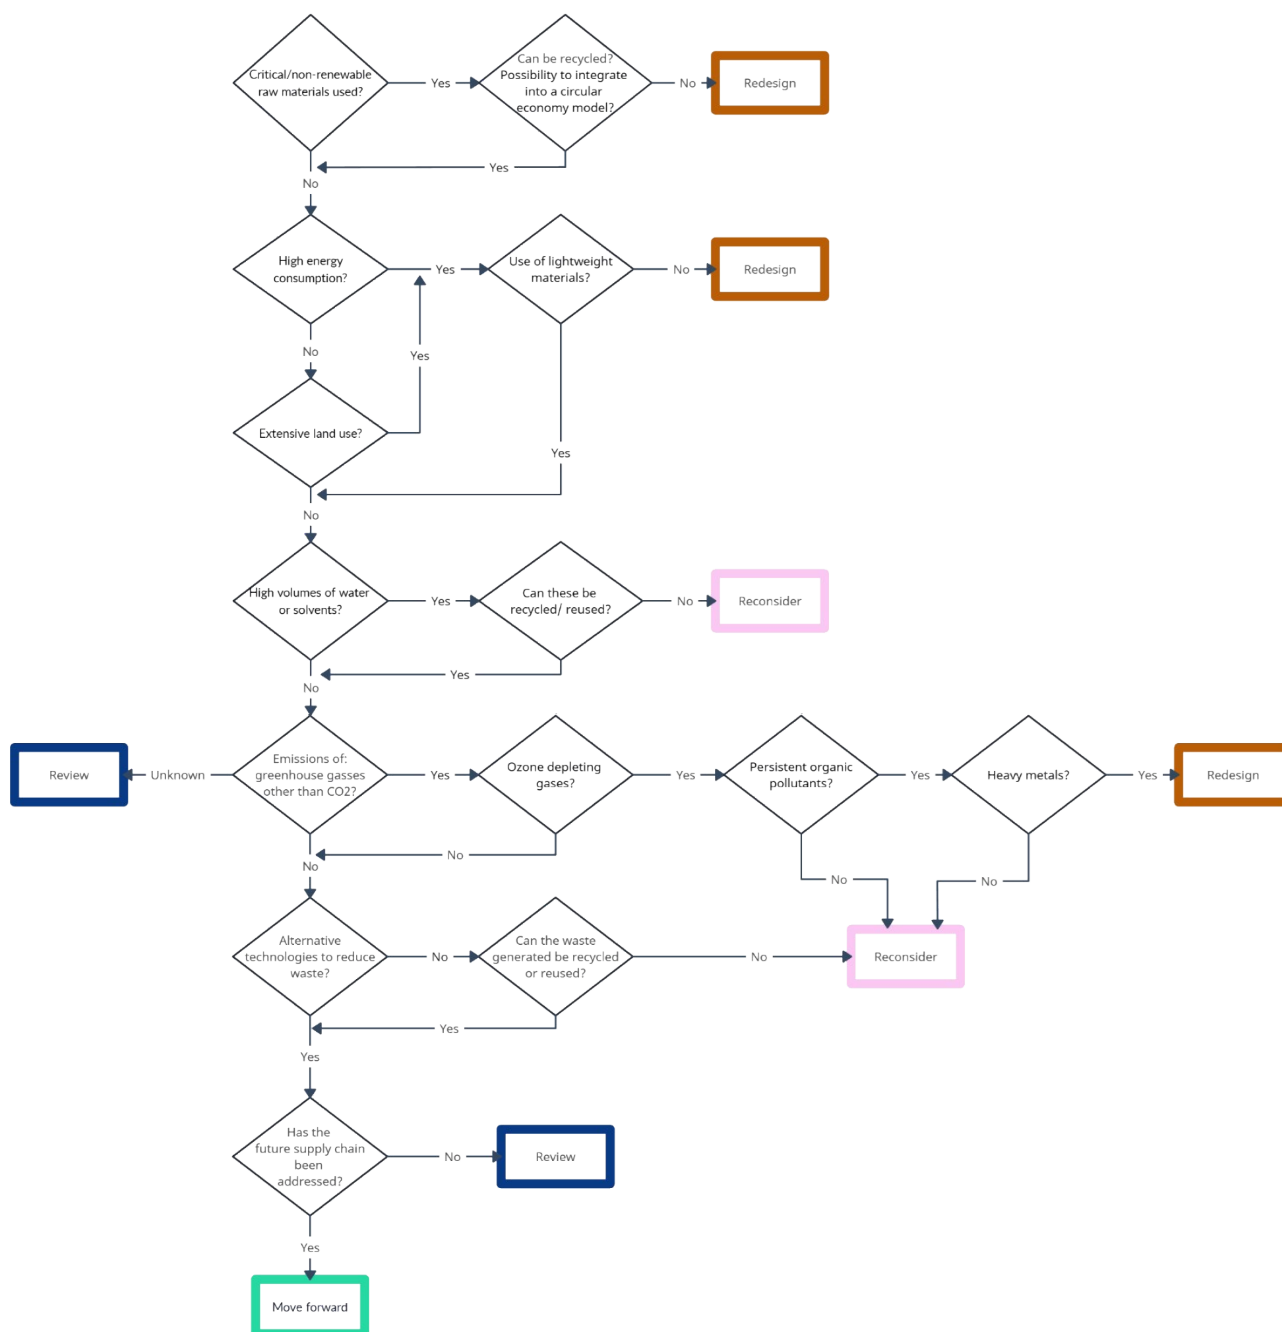

Figure S1. Road map for assigning a manufacturing sustainability color code in AdMaCat. Orange, pink, blue and green indicate redesign, reconsider, review and move forward as suggested actions.
